# Supplementary material for: Effects of germline and somatic events in candidate BRCA-like genes on breast-tumor signatures
Source: PubMed Central journal article supplement (PMC7526916; doi:10.1371/journal.pone.0239197), 2020-09-30

Intersection Size

20  
15  
10  
5  
0

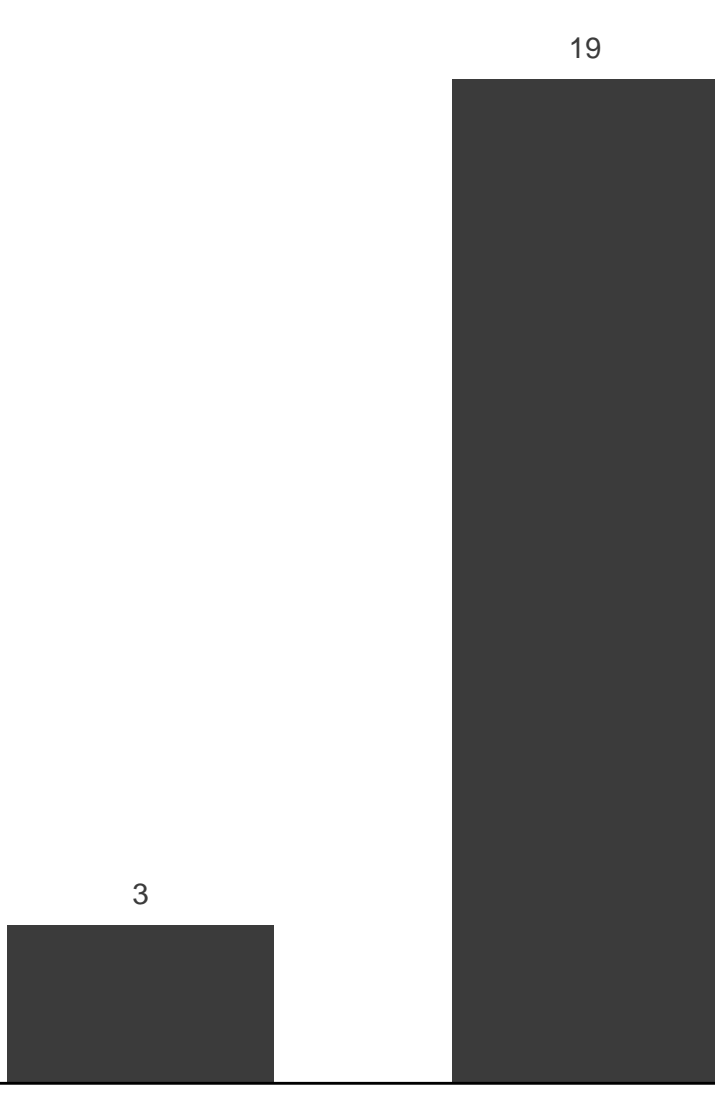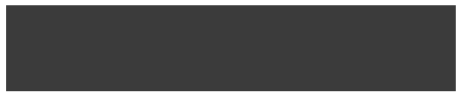

BRCA1 germline mutation

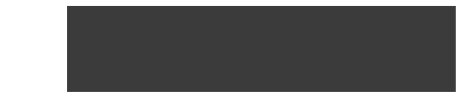

BRCA1 loss of heterozygosity

20 15 10 5 0

Set Size

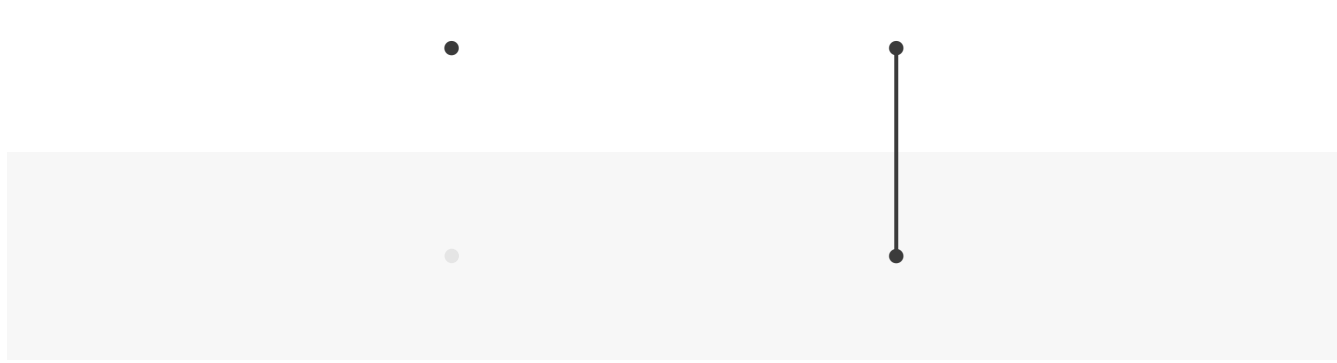

Supplement: pone.0239197.s012.pdf [file pone.0239197.s012.pdf]
