# Supplementary material for: Effects of germline and somatic events in candidate BRCA-like genes on breast-tumor signatures
Source: PubMed Central journal article supplement (PMC7526916; doi:10.1371/journal.pone.0239197), 2020-09-30

**A** Germline BRCA1 mutation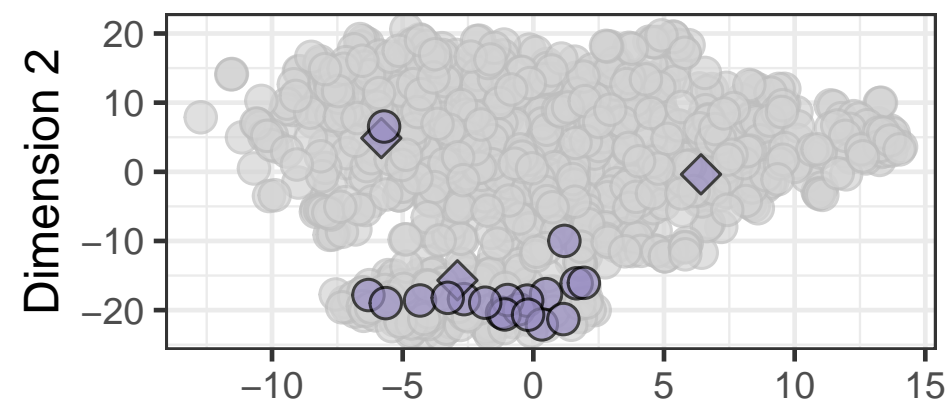**B** Germline BRCA2 mutation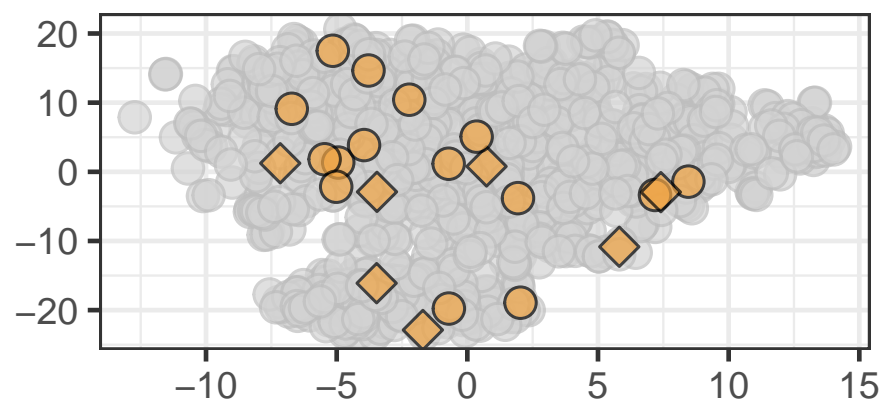**C** BRCA1 somatic mutation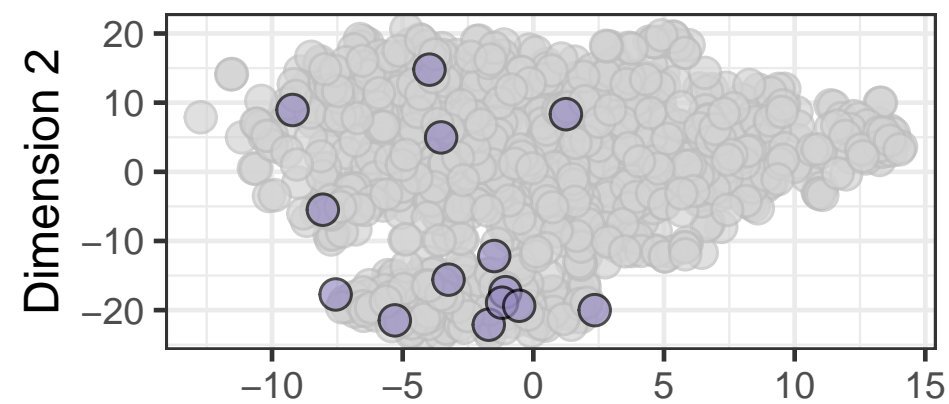**D** BRCA2 somatic mutation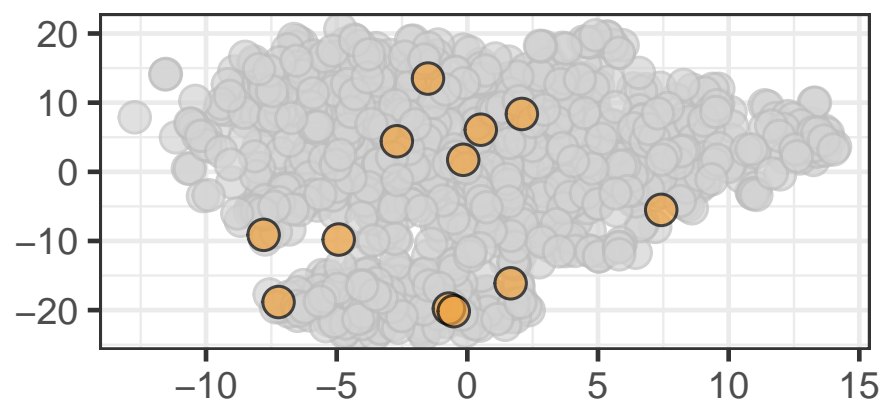**E** BRCA1 homozygous deletion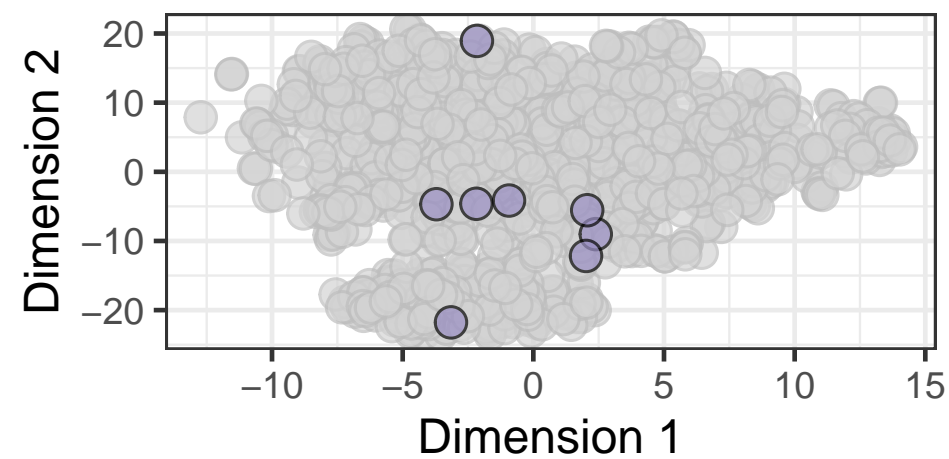**F** BRCA2 homozygous deletion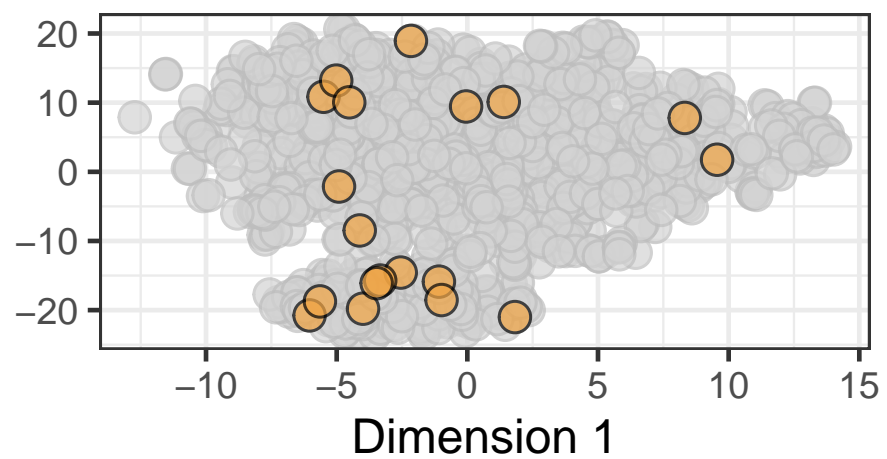**G** BRCA1 hypermethylation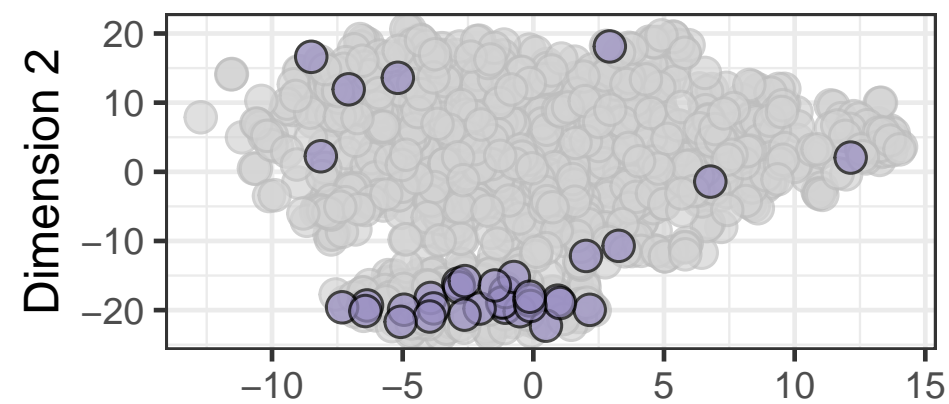**H** BRCA2 hypermethylation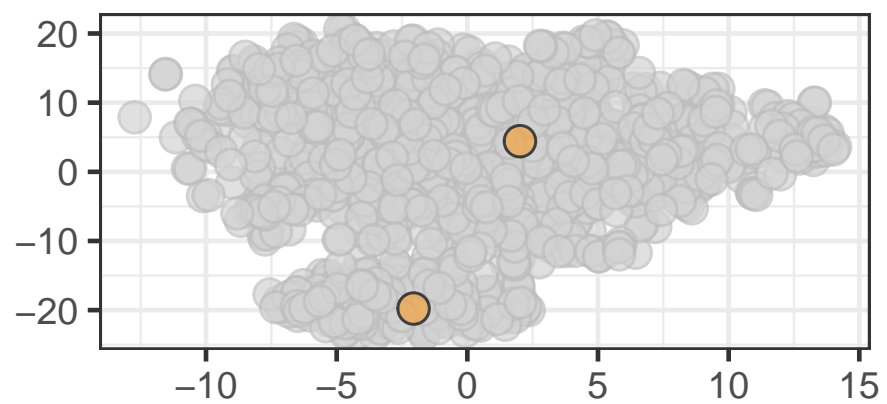

Supplement: pone.0239197.s022.pdf [file pone.0239197.s022.pdf]
