# Supplementary material for: Effects of germline and somatic events in candidate BRCA-like genes on breast-tumor signatures
Source: PubMed Central journal article supplement (PMC7526916; doi:10.1371/journal.pone.0239197), 2020-09-30

# Germline mutations

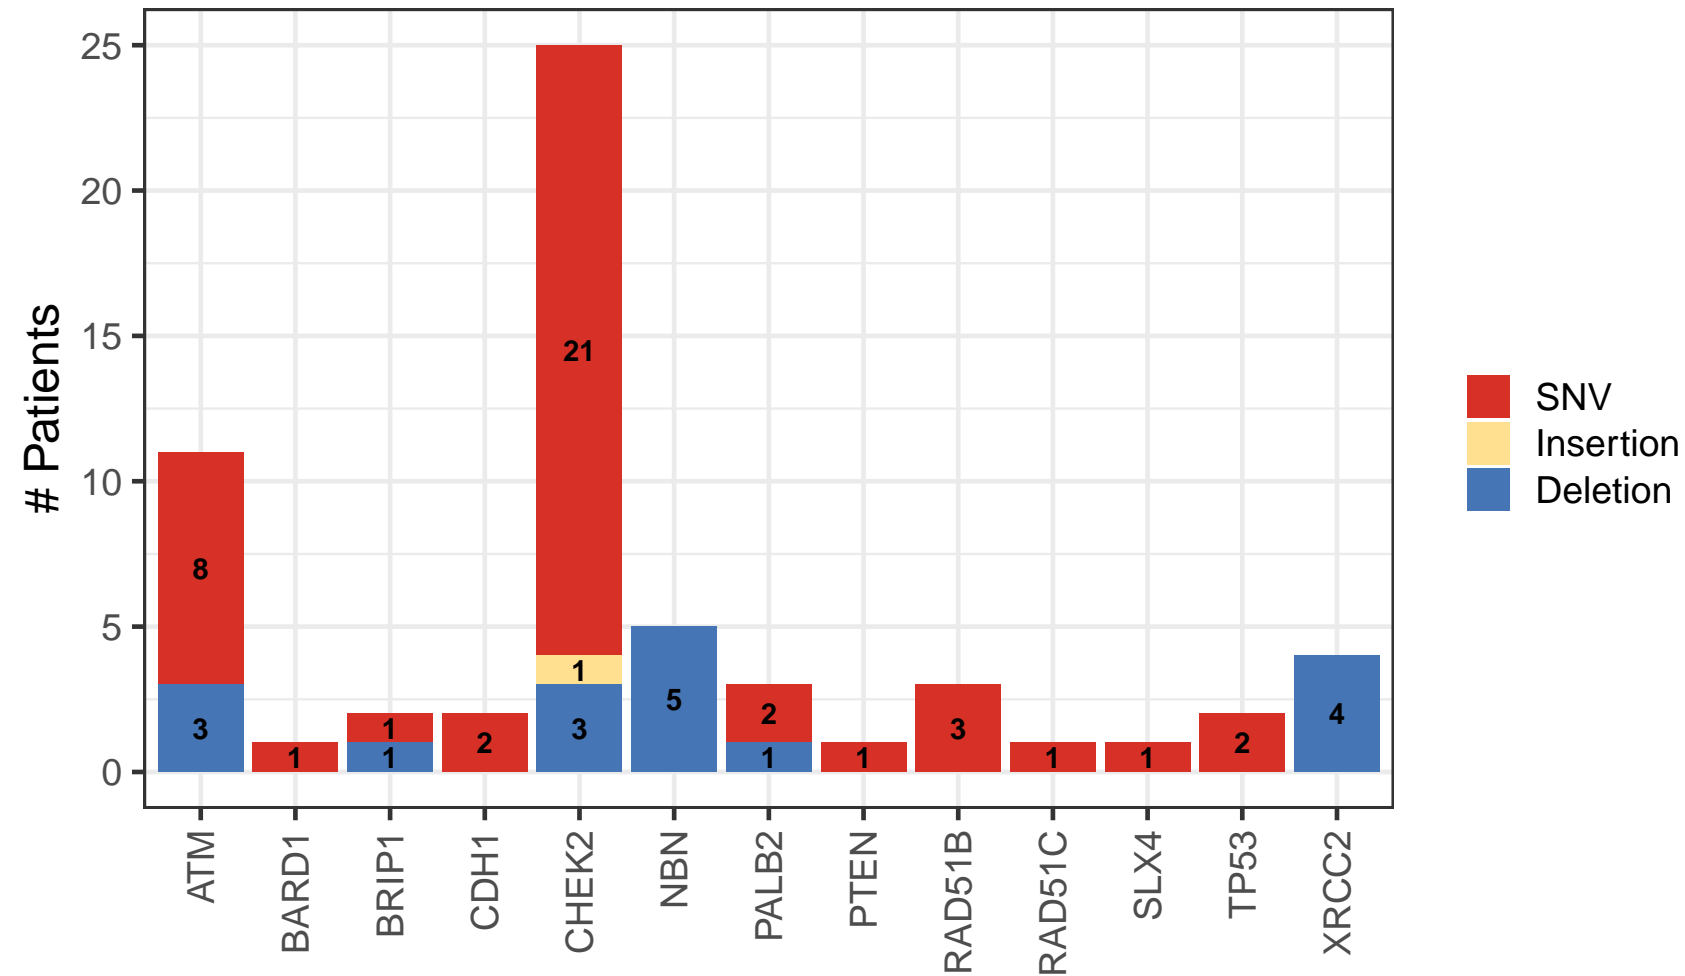

Supplement: pone.0239197.s027.pdf [file pone.0239197.s027.pdf]
