# Supplementary material for: Effects of germline and somatic events in candidate BRCA-like genes on breast-tumor signatures
Source: PubMed Central journal article supplement (PMC7526916; doi:10.1371/journal.pone.0239197), 2020-09-30
Supplement: pone.0239197.s037.pdf [file pone.0239197.s037.pdf]

# Clinical characteristics

Infiltrating Lobular Carcinoma ( $p = 2e-08$ )  
ER Positive ( $p = 4.6e-08$ )  
PR Positive ( $p = 1.4e-05$ )  
Asian Race ( $p = 0.37$ )  
Large Tumor Size ( $p = 0.64$ )  
HER2 Equivocal ( $p = 1$ )  
HER2 Positive ( $p = 1$ )  
Positive Margins ( $p = 1$ )  
Negative Margins ( $p = 1$ )  
Post Menopause ( $p = 1$ )  
Mucinous Carcinoma ( $p = 1$ )  
Extensive Node Involvement ( $p = 1$ )  
Late Stage ( $p = 1$ )  
History Other Malignancy ( $p = 1$ )  
White Race ( $p = 1$ )  
Black or African-American Race ( $p = 1$ )  
Sex Male ( $p = 1$ )  
Close Margins ( $p = 1$ )  
Pre Menopause ( $p = 1$ )  
Peri Menopause ( $p = 1$ )  
Other Histology ( $p = 1$ )  
Mixed Histology ( $p = 1$ )  
Metaplastic Carcinoma ( $p = 1$ )  
Has Distant Metastasis ( $p = 1$ )  
Early Onset Diagnosis ( $p = 0.44$ )  
Infiltrating Ductal Carcinoma ( $p = 1.8e-05$ )  
Triple Negative ( $p = 4.7e-09$ )

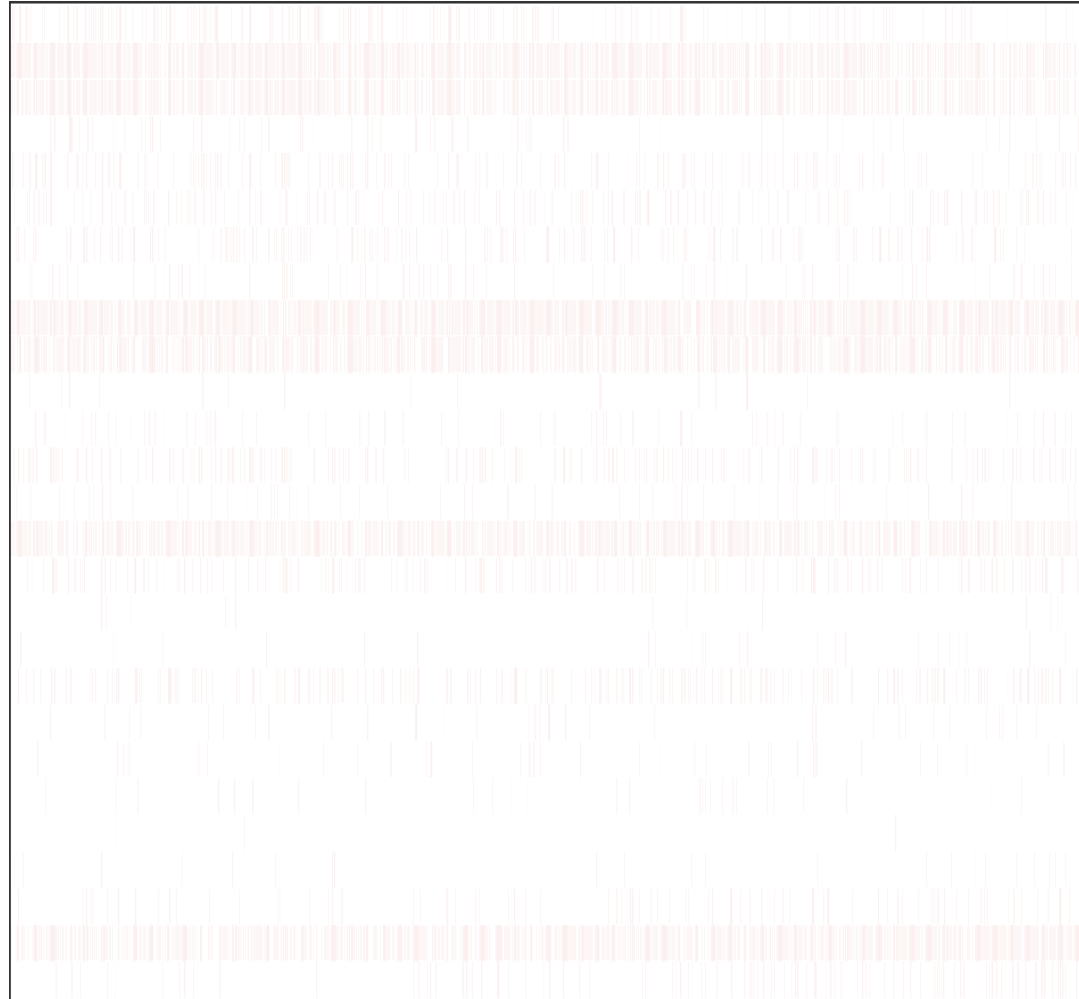

Patient
